# Supplementary material
Source: HighWire-hosted journal article supplement (https://ard.bmj.com/content/ard-2023-225414)
Supplement: inline-supplementary-material-2 [file inline-supplementary-material-2.pdf]

**Supplementary Table 2.** Descriptive clinical outcomes at week 24

| <b>DAS28-CRP</b> |             |           |          |            |                    |                   |
|------------------|-------------|-----------|----------|------------|--------------------|-------------------|
|                  | <b>Mean</b> | <b>SD</b> | <b>N</b> | <b>SEM</b> | <b>95%CI (low)</b> | <b>95%CI (hi)</b> |
| Reference        | 2.3         | 0.8       | 272      | 0.05       | 2.20               | 2.40              |
| Non-responders   | 4.7         | 1.1       | 83       | 0.12       | 4.46               | 4.94              |
| Persisting pain  | 3.2         | 1.2       | 82       | 0.13       | 2.94               | 3.46              |
| <b>RAID</b>      |             |           |          |            |                    |                   |
|                  | <b>Mean</b> | <b>SD</b> | <b>N</b> | <b>SEM</b> | <b>95%CI (low)</b> | <b>95%CI (hi)</b> |
| Reference        | 2.4         | 1.8       | 321      | 0.10       | 2.20               | 2.60              |
| Non-responders   | 5.4         | 1.9       | 97       | 0.19       | 5.02               | 5.78              |
| Persisting pain  | 5.1         | 1.9       | 123      | 0.17       | 4.76               | 5.44              |
| <b>PHQ-9</b>     |             |           |          |            |                    |                   |
|                  | <b>Mean</b> | <b>SD</b> | <b>N</b> | <b>SEM</b> | <b>95%CI (low)</b> | <b>95%CI (hi)</b> |
| Reference        | 3.8         | 3.5       | 318      | 0.20       | 3.42               | 4.18              |
| Non-responders   | 7.3         | 4.5       | 95       | 0.46       | 6.40               | 8.20              |
| Persisting pain  | 6.6         | 4.5       | 122      | 0.41       | 5.80               | 7.40              |
| <b>HAQ-DI</b>    |             |           |          |            |                    |                   |
|                  | <b>Mean</b> | <b>SD</b> | <b>N</b> | <b>SEM</b> | <b>95%CI (low)</b> | <b>95%CI (hi)</b> |
| Reference        | 0.5         | 0.5       | 321      | 0.03       | 0.45               | 0.55              |
| Non-responders   | 1.1         | 0.7       | 98       | 0.07       | 0.96               | 1.24              |
| Persisting pain  | 1.0         | 0.5       | 123      | 0.05       | 0.91               | 1.09              |
| <b>PCS</b>       |             |           |          |            |                    |                   |
|                  | <b>Mean</b> | <b>SD</b> | <b>N</b> | <b>SEM</b> | <b>95%CI (low)</b> | <b>95%CI (hi)</b> |
| Reference        | 9.1         | 10        | 317      | 0.56       | 8.00               | 10.20             |
| Non-responders   | 18.5        | 13.2      | 92       | 1.38       | 15.80              | 21.20             |
| Persisting pain  | 18.9        | 11.3      | 123      | 1.02       | 16.90              | 20.90             |
